# Supplementary material for: Association of the plasma xanthine oxidoreductase activity with the metabolic parameters and vascular complications in patients with type 2 diabetes
Source: PubMed Central journal article supplement (PMC7881005; doi:10.1038/s41598-021-83234-9), 2021-02-12
Supplement: 41598_2021_83234_MOESM1_ESM.pdf [file 41598_2021_83234_MOESM1_ESM.pdf]

## **Supplementary Information**

### **Association of the plasma xanthine oxidoreductase activity with the metabolic parameters and vascular complications in patients with type 2 diabetes**

Tomoko Okuyama<sup>1</sup>, Jun Shirakawa<sup>1,2\*</sup>, Takashi Nakamura<sup>3</sup>, Takayo Murase<sup>3</sup>, Daisuke Miyashita<sup>1</sup>, Ryota Inoue<sup>1,2</sup>, Mayu Kyohara<sup>1</sup>, Yu Togashi<sup>1</sup>, Yasuo Terauchi<sup>1</sup>

1. Department of Endocrinology and Metabolism, Graduate School of Medicine, Yokohama City University, Yokohama, Japan
2. Laboratory and Diabetes and Metabolic Disorders. Institute for Molecular and Cellular Regulation (IMCR), Gunma University, Maebashi, Japan
3. Mie Research Laboratories, Sanwa Kagaku Kenkyusho Co., Ltd., Inabe, Mie, Japan.

\*Correspondence to: Jun Shirakawa, MD, PhD

Laboratory and Diabetes and Metabolic Disorders

Institute for Molecular and Cellular Regulation (IMCR)

Gunma University 3-39-15 Showa-machi, Maebashi 371-8512, Japan

E-mail: jshira-ky@umin.ac.jp

Tel number: +81-27-220-8850, Fax number: +81-27-220-8895

## Supplementary Figure 1

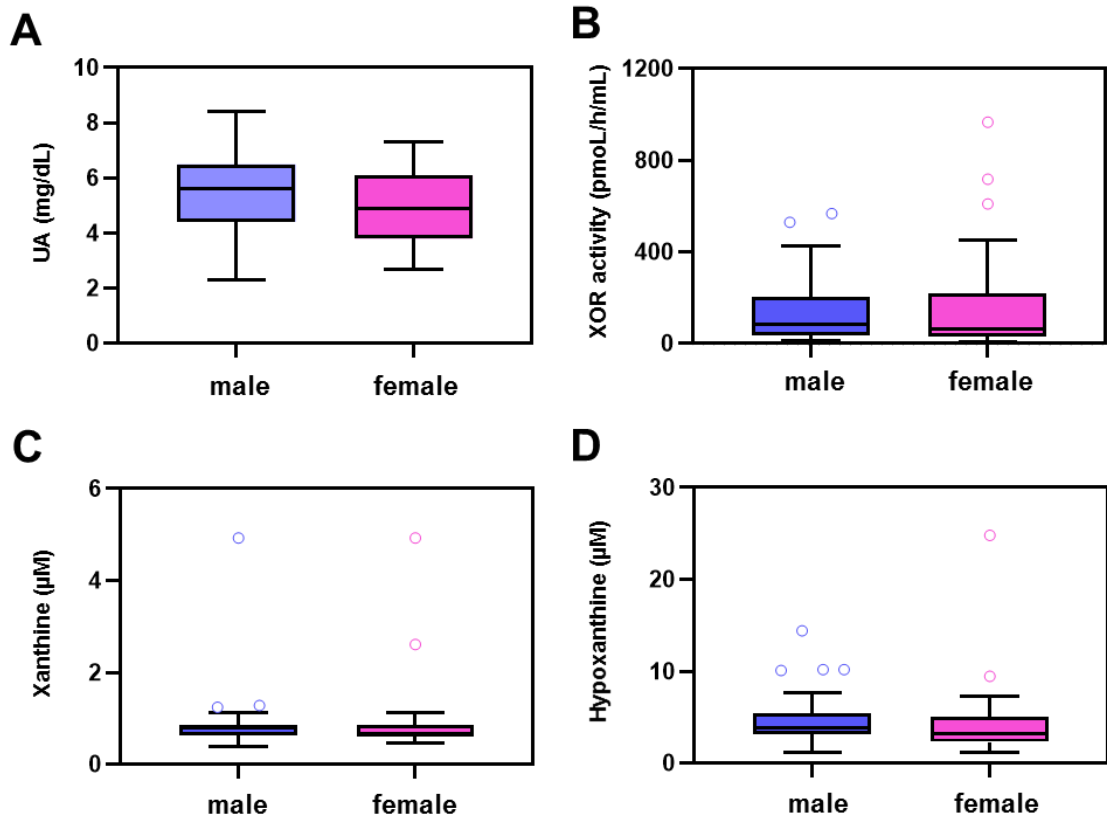

### Supplementary Figure 1. Plasma XOR activity, purine catabolism, and uric acid levels in males and females.

(A) serum uric acid levels (mg/dL), (B) plasma XOR activity (pmol/h/mL), (C) plasma xanthine ( $\mu\text{M}$ ), and (D) plasma hypoxanthine ( $\mu\text{M}$ ) levels in males and females.

**Supplementary Table 1. Correlation analyses for plasma XOR activity.**

|                              | R      | <i>P</i> value |
|------------------------------|--------|----------------|
| Age                          | -0.146 | 0.161          |
| BMI                          | 0.502  | 0.000          |
| Waist circumference          | 0.322  | 0.009          |
| Duration conduction velocity | -0.295 | 0.006          |
| HbA1c                        | 0.083  | 0.427          |
| Glycated albumin             | -0.266 | 0.010          |
| Fasting blood glucose        | 0.002  | 0.983          |
| Fasting IRI                  | 0.539  | 0.000          |
| Fasting CPR                  | 0.512  | 0.000          |
| HOMA-IR                      | 0.466  | 0.000          |
| eGFR                         | 0.005  | 0.964          |
| Cystatin C                   | 0.081  | 0.440          |
| UA                           | 0.417  | 0.000          |
| LDL-C                        | 0.156  | 0.134          |
| HDL-C                        | -0.303 | 0.003          |
| TG                           | 0.318  | 0.002          |
| AST                          | 0.808  | 0.000          |
| ALT                          | 0.881  | 0.000          |
| $\gamma$ -GTP                | 0.759  | 0.000          |
| Fib4-index                   | 0.310  | 0.054          |
| ACR                          | 0.037  | 0.723          |
| Urinary CPR                  | 0.406  | 0.010          |

XOR, xanthine oxidoreductase; BMI, body mass index; HbA1c, glycosylated hemoglobin; IRI, immunoreactive insulin; CPR, C-peptide immunoreactivity; HOMA-IR, homeostasis model assessment of insulin resistance; eGFR, estimated glomerular filtration rate; UA, serum uric acid level; T-Chol, serum total cholesterol level; HDL-C, serum high-density lipoprotein cholesterol level; LDL-C, serum low density lipoprotein cholesterol level; TG, serum triglyceride level; AST, serum aspartate aminotransferase level; ALT, serum alanine aminotransferase level;  $\gamma$ -GTP, serum  $\gamma$ -glutamyl transpeptidase level; ACR, urinary albumin to creatinine ratio

**Supplementary Table 2. Correlation analyses for plasma xanthine.**

|                       | R      | <i>P</i> value |
|-----------------------|--------|----------------|
| Age                   | 0.057  | 0.586          |
| BMI                   | 0.386  | 0.000          |
| Waist circumference   | 0.419  | 0.001          |
| Duration              | -0.128 | 0.239          |
| HbA1c                 | -0.003 | 0.975          |
| Glycated albumin      | -0.165 | 0.111          |
| Fasting blood glucose | -0.075 | 0.472          |
| Fasting IRI           | 0.347  | 0.001          |
| Fasting CPR           | 0.320  | 0.002          |
| HOMA-IR               | 0.271  | 0.009          |
| eGFR                  | -0.122 | 0.241          |
| Cystatin C            | 0.191  | 0.065          |
| UA                    | 0.392  | 0.000          |
| LDL-C                 | 0.147  | 0.157          |
| HDL-C                 | -0.207 | 0.045          |
| TG                    | 0.178  | 0.086          |
| AST                   | 0.620  | 0.000          |
| ALT                   | 0.562  | 0.000          |
| $\gamma$ -GTP         | 0.535  | 0.000          |
| Fib4-index            | 0.427  | 0.007          |
| ACR                   | 0.124  | 0.234          |
| Urinary CPR           | 0.133  | 0.421          |

BMI, body mass index; HbA1c, glycosylated hemoglobin; IRI, immunoreactive insulin; CPR, C-peptide immunoreactivity; HOMA-IR, homeostasis model assessment of insulin resistance; eGFR, estimated glomerular filtration rate; UA, serum uric acid level; T-Chol, serum total cholesterol level; HDL-C, serum high-density lipoprotein cholesterol level; LDL-C, serum low density lipoprotein cholesterol level; TG, serum triglyceride level; AST, serum aspartate aminotransferase level; ALT, serum alanine aminotransferase level;  $\gamma$ -GTP, serum  $\gamma$ -glutamyl transpeptidase level; ACR, urinary albumin to creatinine ratio

**Supplementary Table 3. Correlation analyses for plasma hypoxanthine.**

|                       | R      | P value |
|-----------------------|--------|---------|
| Age                   | -0.108 | 0.301   |
| BMI                   | 0.141  | 0.176   |
| Waist circumference   | 0.232  | 0.063   |
| Duration              | -0.144 | 0.182   |
| HbA1c                 | 0.178  | 0.086   |
| Glycated albumin      | -0.022 | 0.836   |
| Fasting blood glucose | -0.013 | 0.898   |
| Fasting IRI           | 0.089  | 0.400   |
| Fasting CPR           | 0.057  | 0.589   |
| HOMA-IR               | 0.052  | 0.623   |
| eGFR                  | 0.104  | 0.318   |
| Cystatin C            | -0.082 | 0.434   |
| UA                    | 0.046  | 0.662   |
| LDL-C                 | 0.075  | 0.471   |
| HDL-C                 | -0.234 | 0.023   |
| TG                    | 0.190  | 0.067   |
| AST                   | 0.085  | 0.605   |
| ALT                   | 0.053  | 0.746   |
| $\gamma$ -GTP         | 0.107  | 0.517   |
| Fib4-index            | 0.007  | 0.967   |
| ACR                   | -0.143 | 0.170   |
| Urinary CPR           | 0.101  | 0.543   |

BMI, body mass index; HbA1c, glycosylated hemoglobin; IRI, immunoreactive insulin; CPR, C-peptide immunoreactivity; HOMA-IR, homeostasis model assessment of insulin resistance; eGFR, estimated glomerular filtration rate; UA, serum uric acid level; T-Chol, serum total cholesterol level; HDL-C, serum high-density lipoprotein cholesterol level; LDL-C, serum low density lipoprotein cholesterol level; TG, serum triglyceride level; AST, serum aspartate aminotransferase level; ALT, serum alanine aminotransferase level;  $\gamma$ -GTP, serum  $\gamma$ -glutamyl transpeptidase level; ACR, urinary albumin to creatinine ratio
